# Supplementary material for: Survival in a Contemporary, Real-World Cohort of Patients with Mixed-Phenotype Transthyretin Amyloid Cardiomyopathy Treated with Tafamidis: An Analysis from THAOS
Source: Springer Nature journal article supplement (doi:10.1007/s40119-025-00421-9), 2025-07-09
Supplement: MOESM1 [file 40119_2025_421_MOESM1_ESM.pdf]

**Survival in a Contemporary, Real-World Cohort of Patients With Mixed-Phenotype  
Transthyretin Amyloid Cardiomyopathy Treated With Tafamidis: An Analysis From  
THAOS**

Jonas Wixner<sup>1</sup>, Angela Dispenzieri<sup>2</sup>, Leslie Amass<sup>3</sup>, Martin Carlsson<sup>3</sup>, Steve Riley<sup>4</sup>, Evan Powers<sup>5</sup>,  
Jeffery W Kelly<sup>5</sup>, on behalf of the THAOS investigators

<sup>1</sup>Department of Public Health and Clinical Medicine, Umeå University, Umeå, Sweden; <sup>2</sup>Division of Hematology, Mayo Clinic, Rochester, MN, USA; <sup>3</sup>Pfizer Inc, New York, NY, USA; <sup>4</sup>Pfizer Inc, Groton, CT, USA; <sup>5</sup>Department of Chemistry, The Scripps Research Institute, La Jolla, CA, USA

**Corresponding author:** Jonas Wixner, Department of Medicine, Umeå University Hospital, Akutvägen 1, S-90185 Umeå, Sweden; E-mail: [jonas.wixner@umu.se](mailto:jonas.wixner@umu.se)

**Supplementary Table S1** Ethics committees

|                                                                                                                                                                                      |
|--------------------------------------------------------------------------------------------------------------------------------------------------------------------------------------|
| AEMPS - Agencia Espanola de Medicamentos y Product<br>Calle Campezo 1-Edificio 8<br>Madrid, 28022<br>SPAIN                                                                           |
| Azienda Ospedaliera Policlinico S.Orsola Malpighi<br>Bologna, 40100<br>ITALY                                                                                                         |
| Comitato Etico AOU Bologna Policlinico S. Orsola Segreteria Scientifica Comitato Etico<br>Azienda Ospedaliero-Universitaria di Bologna, Via Albertoni, 15<br>Bologna, 40138<br>ITALY |
| Biomedical Research Alliance of New York<br>1981 Marcus Ave,Ste 210<br>New Hyde Park, NY 11042<br>UNITED STATES                                                                      |
| CCTIRS<br>Secrétaire Générale du Comité,1 rue Descartes<br>Paris Cedex 05, NA 75231<br>FRANCE                                                                                        |
| CEIC Illes Balears<br>C/ de Jesús, 38,Conselleria de Salut, Família i Benestar Social<br>Palma, 07010<br>SPAIN                                                                       |
| Centro Hospitalar de Lisboa Norte, EPE - Hospital Santa Maria<br>Av. Prof. Egas Moniz<br>Lisboa, 1649-035<br>PORTUGAL                                                                |
| Hospital Santo Antonio<br>Servicio De Endocrinologia,Largo Prof. Abel Salazar                                                                                                        |

|                                                                                                                                                                                                      |
|------------------------------------------------------------------------------------------------------------------------------------------------------------------------------------------------------|
| <p>Portp, 4000</p> <p>PORTUGAL</p>                                                                                                                                                                   |
| <p>Cleveland Clinic Abu Dhabi Research Ethics Committee (REC)</p> <p>Office of Clinical Research</p> <p>PO Box 112412, N/A, N/A</p> <p>Abu Dhabi, N/A</p> <p>UNITED ARAB EMIRATES</p>                |
| <p>Colorado Multiple Institute Review Board</p> <p>13001 E 17th Place,Rm N3214</p> <p>Aurora, CO 80010</p> <p>UNITED STATES</p>                                                                      |
| <p>Comisión de Ética en Investigación</p> <p>Vasco de Quiroga Num. 15, Tlalpan, Instituto Nacional de Ciencias Médicas y Nutrición</p> <p>Mexico, D.F. 14000</p> <p>MEXICO</p>                       |
| <p>Comissão de ética do CHAA</p> <p>Rua dos Cutileiros, Creixomil</p> <p>Guimarães, 4835-044</p> <p>PORTUGAL</p>                                                                                     |
| <p>Comite consultatif sur le traitement de l'information en matiere de recherche dans le domaine</p> <p>1 rue Descartes,Secrétaire Générale du Comité</p> <p>Paris Cedex 05, 75231</p> <p>FRANCE</p> |
| <p>Comite consultatif sur le traitement de l'</p> <p>information en matiere de recherche dans le domaine de la sante, 1,rue descartes</p> <p>Paris cedex 05, 75231</p> <p>FRANCE</p>                 |
| <p>Commission Nationale de informatique et des libert</p> <p>8.rue vivienne, CS 30223</p> <p>Paris cedex 02, 75083</p> <p>FRANCE</p>                                                                 |

|                                                                                                                                                                                          |
|------------------------------------------------------------------------------------------------------------------------------------------------------------------------------------------|
| <p>Comité de Ética IDIM Alfredo Lanari<br/> Av. Combatientes de Malvinas 3150<br/> Ciudad Autónoma de Buenos Aires, CP 1427<br/> ARGENTINA</p>                                           |
| <p>CONEP (Comissao Nacional de Etica em Pesquisa)<br/> SRTV 701, Via W 5 Norte, Lote D, Edificio PO 700, 3 andar - Asa Norte<br/> Brasilia, DF 70719-040<br/> BRAZIL</p>                 |
| <p>Comite de Etica em Pesquisa do Instituto Dante Pazzanese de Cardiologia<br/> Avenida Dr. Dante Pazzanese, 500, 8 Andar Ibirapuera<br/> Sao Paulo, SAO PAULO 04012-180<br/> BRAZIL</p> |
| <p>Conjoint Health Research Ethics Board<br/> 2500 University Drive NW,3rd Floor MacKimmie Tower<br/> Calgary, AB T2N 1N4<br/> CANADA</p>                                                |
| <p>CPP Ile de France IX<br/> 51 Ave du Marechal de Lattre de Tassigny, Pr Roudot-Thoraval, CHU Henri Mondor<br/> Créteil, 94010<br/> FRANCE</p>                                          |
| <p>Ethics Committee Careggi Firenze<br/> Nuovo Ingresso Careggi (NIC) - Didattica, pad. 3 - Largo Brambilla, 3, Rosina Cerbelli<br/> Firenze, 50134<br/> ITALY</p>                       |
| <p>Ethics Committee for Multicenter Trials<br/> Ministry of health, 5 Sveta Nedelia Square<br/> Sofia, 1000<br/> BULGARIA</p>                                                            |
| <p>Ethikkommission - Ethikausschuss am Campus Virchow-Klinikum<br/> EC<br/> Chariteplatz 1</p>                                                                                           |

|                                                                                                                                                                                                                          |
|--------------------------------------------------------------------------------------------------------------------------------------------------------------------------------------------------------------------------|
| <p>Berlin, 10117</p> <p>GERMANY</p>                                                                                                                                                                                      |
| <p>Ethikkommission an der medizinischen Fakultät</p> <p>Pauwelsstr. 30 Ethik-Kommission an der medizinischen Fakultät, der rheinisch-westfälischen<br/>technischen Hochschule Aa</p> <p>Aachen, 52074</p> <p>GERMANY</p> |
| <p>Fondazione Policlinico Universitario A. Gemelli Università Cattolica del S. Cuore</p> <p>Largo Agostino Gemelli 8</p> <p>Roma, 00168</p> <p>ITALY</p>                                                                 |
| <p>Hospital Santo Antonio</p> <p>Servicio De Endocrinologia, Largo Prof. Abel Salazar</p> <p>Porto, 4000</p> <p>PORTUGAL</p>                                                                                             |
| <p>Hospital Universitario Clementino Fraga Filho - HU</p> <p>Rua Professor Rodolpho Paulo Rocco, 255</p> <p>Rio de Janeiro, 21941-913</p> <p>BRAZIL</p>                                                                  |
| <p>IRB of Samsung Medical Center</p> <p>50 Irwon-ro, Gangnam-gu</p> <p>Seoul, 135-710</p> <p>KOREA, REPUBLIC OF</p>                                                                                                      |
| <p>Johns Hopkins Medical IRB</p> <p>1620 McElderry Street Office of Human Subject Research, Reed Hall, Ste B-130</p> <p>Baltimore, MD 21205-1911</p> <p>UNITED STATES</p>                                                |
| <p>Klinikum der Universität Heidelberg</p> <p>Zentrallabor</p> <p>Im Neuenheimer Feld</p>                                                                                                                                |

|                                                                                                                                                        |
|--------------------------------------------------------------------------------------------------------------------------------------------------------|
| <p>Heidelberg, 69120<br/>GERMANY</p>                                                                                                                   |
| <p>Kumamoto University Ethical Review Committee<br/>1-1-1, Honjo<br/>Kumamoto, TOKYO<br/>JAPAN</p>                                                     |
| <p>Mayo Clinic Institutional Review Board<br/>200 First St SW<br/>Rochester, MN 55905<br/>UNITED STATES</p>                                            |
| <p>Medical College of Wisconsin/ Froedtert Hospital<br/>9200 W Wisconsin Ave, Institutional Review Board<br/>Milwaukee, WI 53226<br/>UNITED STATES</p> |
| <p>Medical Ethics Review Board_ University Medical Cen<br/>P.O. Box 30.001<br/>GRONINGEN,, LA10 9700 RB<br/>NETHERLANDS</p>                            |
| <p>Medical Research Ethics Committee, University Malaya Medical Centre<br/>Lembah Pantai<br/>Kuala Lumpur, 59100<br/>MALAYSIA</p>                      |
| <p>National Taiwan University Hospital<br/>No. 7, Chung-Shan South Road, R.O.C<br/>Taipei, 100<br/>TAIWAN</p>                                          |
| <p>Ochsner Institutional Review Board<br/>1514 Jefferson Hwy<br/>New Orleans, LA 70121<br/>UNITED STATES</p>                                           |

|                                                                                                                                                                                                            |
|------------------------------------------------------------------------------------------------------------------------------------------------------------------------------------------------------------|
| <p>Regional Ethics Committee for Clinical Trials of the Tuscany Region</p> <p>Santa Chiara Site, Via Roma 67, Technical Scientific Secretariat</p> <p>Pisa, GREATER NORTH WEST AREA 56126</p> <p>ITALY</p> |
| <p>Regionala etikprövningsnämnden i Umeå</p> <p>Samverkanshuset, Universitetsområdet</p> <p>Umeå, 901 87</p> <p>SWEDEN</p>                                                                                 |
| <p>Research Ethics Committee, King Faisal Specialist Hospital and Research Center</p> <p>Al Mathar Ash Shamali</p> <p>Riyadh, 11564</p> <p>SAUDI ARABIA</p>                                                |
| <p>Romania Academy of Medical Sciences</p> <p>National Bioethics Committee of Medicines and Medical Devices</p> <p>Sos. Stefan cel Mare No. 19-21, Sector 2</p> <p>Bucharest, 020125</p> <p>ROMANIA</p>    |
| <p>The Chaim Sheba Medical Center</p> <p>IRB Committee</p> <p>Sackler School of Medicine</p> <p>Tel-Hashomer, 5265601</p> <p>ISRAEL</p>                                                                    |
| <p>University Health Network - Research Ethics Board</p> <p>700 University Avenue, 10th Floor - Room 1056</p> <p>Toronto, ON M5G 1Z5</p> <p>CANADA</p>                                                     |
| <p>University of Chicago Institutional Review Board</p> <p>5751 S Woodlawn Ave, 2nd Fl</p> <p>Chicago, IL 60637</p> <p>UNITED STATES</p>                                                                   |

|                                                                                                                                                                                                   |
|---------------------------------------------------------------------------------------------------------------------------------------------------------------------------------------------------|
| <p>University of Maryland<br/> 800 W Baltimore Street Baltimore Human Research Protection Ofc (HRPO), Ste 100<br/> Baltimore, MD 21201<br/> UNITED STATES</p>                                     |
| <p>University of Pennsylvania, Committee of Studies Involving Human Beings<br/> 3624 Market Street Office of Regulatory Affairs, Ste 301S<br/> Philadelphia, PA 19104-6006<br/> UNITED STATES</p> |
| <p>University of Pittsburgh Human Resource HPRO<br/> 3500 Fifth Ave, Protection Ofc, Hieber Bldg, Main Ofc Ste 106<br/> Pittsburgh, PA 15213<br/> UNITED STATES</p>                               |
| <p>University of Utah Institutional Review Board<br/> 75 S 2000 E<br/> Salt Lake City, UT 84112<br/> UNITED STATES</p>                                                                            |
| <p>Unversitatsklinijum Munster<br/> Institut fur Klinische Chemie uns Laboratoriumsmedizin<br/> Albert Schweitzer StraBe 33<br/> Munster, 48149<br/> GERMANY</p>                                  |
| <p>Vanderbilt Human Research Protection Program<br/> 1313 21st Ave S, 504 Oxford House<br/> Nashville, TN 37232-4315<br/> UNITED STATES</p>                                                       |
| <p>Veterans Affairs Greater Los Angeles Institutional Review Board<br/> 11301 Wilshire Blvd<br/> Los Angeles, CA 90073<br/> UNITED STATES</p>                                                     |
| <p>Washington University Human Research Protection Office<br/> 660 S Euclid Ave, MS0809-29-2300</p>                                                                                               |

St. Louis, MO 63110

UNITED STATES

Western IRB

1019 39th Ave SE Ste 120

Puyallup, WA 98374

UNITED STATES

Yale Human Investigations Committee

55 College St

New Haven, CT 06510

UNITED STATES

**Supplementary Table S2** Demographics and baseline clinical characteristics of patients with mixed-phenotype ATTR-CM enrolled in any year of THAOS.

|                                                                                             | <b>Tafamidis-treated<br/>(n = 156)</b> | <b>Untreated<br/>(n = 963)</b> |
|---------------------------------------------------------------------------------------------|----------------------------------------|--------------------------------|
| <b>Sex, n (%)</b>                                                                           |                                        |                                |
| Female                                                                                      | 31 (19.9)                              | 271 (28.1)                     |
| Male                                                                                        | 125 (80.1)                             | 692 (71.9)                     |
| <b>Race/ethnicity<sup>a</sup>, n (%)</b>                                                    |                                        |                                |
| Afro-Caribbean                                                                              | 1 (0.6)                                | 8 (0.8)                        |
| American Hispanic                                                                           | 1 (0.6)                                | 2 (0.2)                        |
| Asian                                                                                       | 6 (3.8)                                | 62 (6.4)                       |
| Black or African American                                                                   | 25 (16.0)                              | 118 (12.3)                     |
| Latino American                                                                             | 2 (1.3)                                | 36 (3.7)                       |
| White                                                                                       | 85 (54.5)                              | 524 (54.4)                     |
| Other                                                                                       | 0                                      | 35 (3.6)                       |
| <b>Age at symptom onset (y)</b>                                                             | <i>n</i> = 137                         | <i>n</i> = 911                 |
| Median (10 <sup>th</sup> , 90 <sup>th</sup> percentile)                                     | 66.5 (43.5, 82.0)                      | 61.5 (33.8, 77.5)              |
| <b>Time from symptom onset to diagnosis (y)</b>                                             | <i>n</i> = 137                         | <i>n</i> = 822                 |
| Median (10 <sup>th</sup> , 90 <sup>th</sup> percentile)                                     | 4.6 (0.2, 19.2)                        | 2.5 (0.0, 11.8)                |
| <b>Year of enrollment, n (%)</b>                                                            |                                        |                                |
| 2007–2012                                                                                   | 3 (1.9)                                | 280 (29.1)                     |
| 2013–2018                                                                                   | 37 (23.7)                              | 460 (47.8)                     |
| 2019–2023                                                                                   | 116 (74.4)                             | 223 (23.2)                     |
| <b>Age at enrollment (y), median (10<sup>th</sup>, 90<sup>th</sup> percentile)</b>          | 75.8 (63.3, 87.5)                      | 69.6 (47.3, 82.3)              |
| <b>Symptom duration at enrollment (y)</b>                                                   | <i>n</i> = 137                         | <i>n</i> = 911                 |
| Median (10 <sup>th</sup> , 90 <sup>th</sup> percentile)                                     | 6.7 (1.0, 20.0)                        | 5.1 (1.0, 16.7)                |
| <b>Follow-up time<sup>b</sup> (y), median (10<sup>th</sup>, 90<sup>th</sup> percentile)</b> | 1.6 (0.3, 5.5)                         | 2.4 (0.4, 8.3)                 |
| <b>TTR genotype, n (%)</b>                                                                  |                                        |                                |
| Variant                                                                                     | 71 (45.5)                              | 744 (77.3)                     |

|                                                                               |                         |                          |
|-------------------------------------------------------------------------------|-------------------------|--------------------------|
| Wild-type                                                                     | 85 (54.5)               | 219 (22.7)               |
| Most frequent ( $\geq 10\%$ ) <i>TTR</i> variants <sup>d</sup> , <i>n</i> (%) |                         |                          |
| V30M (p.V50M) <sup>e</sup>                                                    | 9 (5.8)                 | 318 (33.0)               |
| V122I (p.V142I)                                                               | 27 (17.3)               | 159 (16.5)               |
| Heart failure, <i>n</i> (%)                                                   | 127 (81.4)              | 715 (74.2)               |
| NYHA class <sup>c</sup> , <i>n</i> (%)                                        |                         |                          |
| I                                                                             | 14 (11.0)               | 86 (12.0)                |
| II                                                                            | 72 (56.7)               | 318 (44.5)               |
| III                                                                           | 34 (26.8)               | 230 (32.2)               |
| IV                                                                            | 3 (2.4)                 | 34 (4.8)                 |
| NT-proBNP (pg/mL)                                                             | <i>n</i> = 50           | <i>n</i> = 381           |
| Median (10 <sup>th</sup> , 90 <sup>th</sup> percentile)                       | 2323 (436.0,<br>9405.5) | 2187 (220.0,<br>8905.0)  |
| LV septum thickness (mm)                                                      | <i>n</i> = 109          | <i>n</i> = 509           |
| Median (10 <sup>th</sup> , 90 <sup>th</sup> percentile)                       | 16.0 (13.0, 21.0)       | 17.0 (12.0, 22.0)        |
| LV ejection fraction (%)                                                      | <i>n</i> = 110          | <i>n</i> = 479           |
| Median (10 <sup>th</sup> , 90 <sup>th</sup> percentile)                       | 54.0 (30.0, 68.0)       | 52.0 (30.0, 67.0)        |
| mBMI                                                                          | <i>n</i> = 109          | <i>n</i> = 572           |
| Median (10 <sup>th</sup> , 90 <sup>th</sup> percentile)                       | 1082 (867.0,<br>1425.8) | 990.0 (730.6,<br>1286.2) |
| Past or current clinical trial participation <sup>f</sup> , <i>n</i> (%)      |                         |                          |
| Yes                                                                           | 28 (17.9)               | 132 (13.7)               |
| Tafamidis trial                                                               | 0                       | 0                        |
| Non-tafamidis trial                                                           | 28 (17.9)               | 132 (13.7)               |
| No                                                                            | 128 (82.1)              | 623 (64.7)               |
| Diagnostic method <sup>g</sup> , <i>n</i> (%)                                 |                         |                          |
| Clinical symptoms                                                             | 152 (97.4)              | 829 (86.1)               |
| Amyloid confirmed on tissue biopsy                                            | 71 (45.5)               | 519 (53.9)               |
| TTR confirmed as precursor protein on tissue biopsy                           | 63 (40.4)               | 343 (35.6)               |
| Scintigraphy                                                                  | 88 (56.4)               | 146 (15.2)               |

|                                                         |                   |                    |
|---------------------------------------------------------|-------------------|--------------------|
| Other                                                   | 30 (19.2)         | 44 (4.6)           |
| eGFR (mL/min/1.73m <sup>2</sup> )                       | <i>n</i> = 60     | <i>n</i> = 647     |
| Median (10 <sup>th</sup> , 90 <sup>th</sup> percentile) | 46.9 (10.6, 78.1) | 61.6 (28.8, 105.2) |
| NAC stage, <i>n</i> (%)                                 | <i>n</i> = 50     | <i>n</i> = 361     |
| I                                                       | 22 (44.0)         | 188 (52.1)         |
| II                                                      | 16 (32.0)         | 117 (32.4)         |
| III                                                     | 12 (24.0)         | 56 (15.5)          |

The number of patients with recorded data shown for variables with missing data. Baseline refers to enrollment or tafamidis treatment initiation (whichever was later) for tafamidis-treated patients, and enrollment for untreated patients

*eGFR* estimated glomerular filtration rate, *LV* left ventricular, *mBMI* modified body mass index, *NAC* National Amyloidosis Centre, *NT-proBNP* N-terminal pro-B-type natriuretic peptide, *NYHA* New York Heart Association, *THAOS* Transthyretin Amyloidosis Outcomes Survey, *TTR* transthyretin

<sup>a</sup> Race was not collected in France or Portugal

<sup>b</sup> Follow-up time is based on consent date to last available follow-up date

<sup>c</sup> Denominator is number of patients with heart failure; 4 tafamidis-treated patients and 47 untreated patients had missing data

<sup>d</sup> One untreated patient had both the V30M and V122I variant and was counted in both groups

<sup>e</sup> Includes patients with G6S (p.G26S) in addition to V30M

<sup>f</sup> Missing for 208 untreated patients

<sup>g</sup> Patients could be diagnosed based on >1 diagnostic method
